# Supplementary material
Source: MDPI journal article supplement (https://www.mdpi.com/2075-163X/13/5/660)
Supplement: s1 [file s1]

# Supplementary Materials: Lysozyme–Mineral Clay Systems: Comparison of Interaction for Controlled Release in Feed Application

Marianna Guagliano \*, Matteo Dell’Anno, Giovanni Dotelli, Elisabetta Finocchio, Maria Lacalamita, Ernesto Mesto, Serena Reggi, Luciana Rossi, Emanuela Schingaro, Elena Staltari and Cinzia Cristiani \*

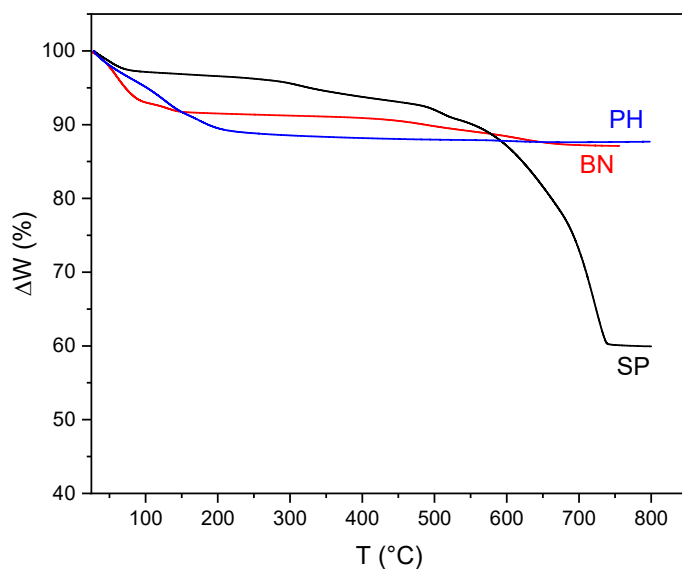

Figure S1. TG analysis of the pristine carriers: Bentonite (BN), Sepiolite (SP) and Phil 75<sup>®</sup> (PH).

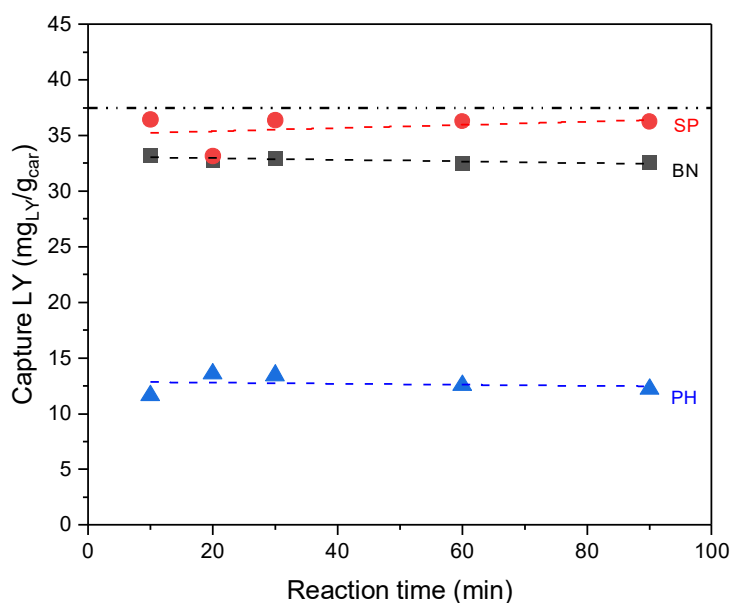

Figure S2. LY uptake as a function of reaction time.

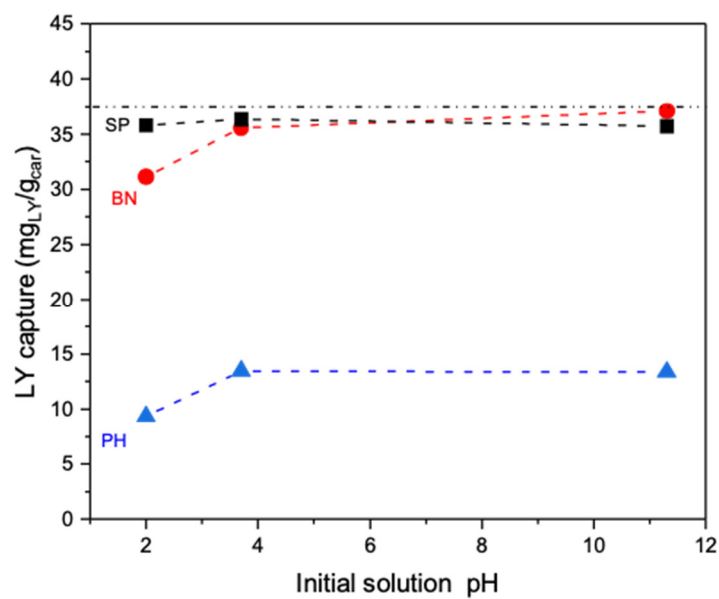

**Figure S3.** LY uptake as a function of pH.

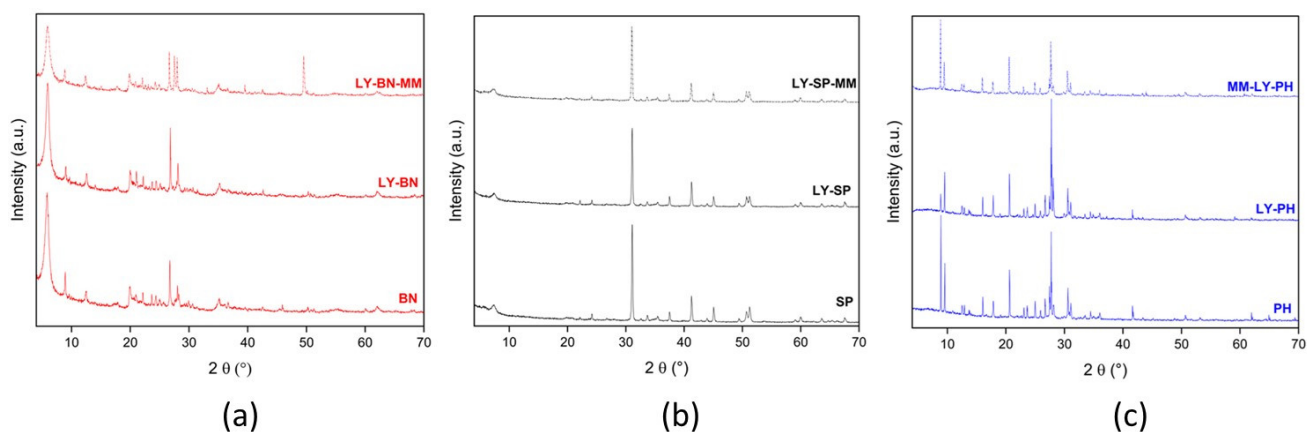

**Figure S4.** Comparison of XRD patterns of pristine carrier, hybrid materials and mechanical mixture for: a) BN-based, b) SP-based and c) PH-based samples.

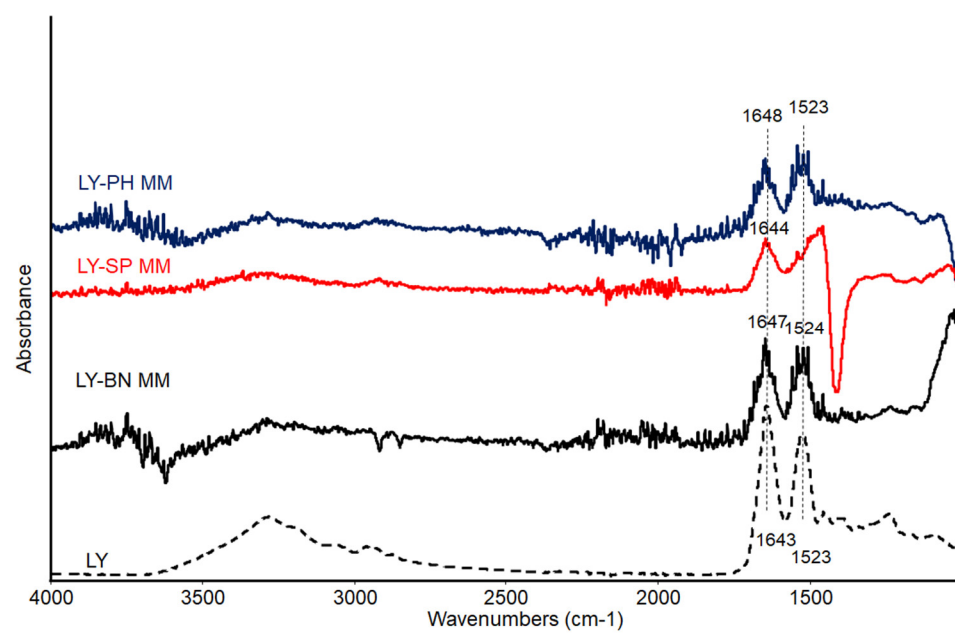

**Figure S5.** ATR IR spectra of the mechanical mixtures. Dashed line: pure LY.
